# Supplementary material for: Oncoplastic breast reconstruction with omental flap: A retrospective study and systematic review
Source: PubMed Central journal article supplement — J Cancer. 2018 Apr 19;9(10):1782–90. doi: 10.7150/jca.25556 (PMC5968766; doi:10.7150/jca.25556), 2018-04-19
Supplement: jcav09p1782s1.pdf [file jcav09p1782s1.pdf]

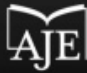

# EDITORIAL CERTIFICATE

This document certifies that the manuscript listed below was edited for proper English language, grammar, punctuation, spelling, and overall style by one or more of the highly qualified native English speaking editors at American Journal Experts.

### Manuscript title:

Breast reconstruction with omentum flap: A retrospective study and systemic review

### Authors:

Chao Ni

### Date Issued:

December 6, 2017

### Certificate Verification Key:

3F5A-430F-7ACB-2F6B-BAF4

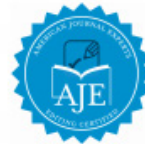

This certificate may be verified at [www.aje.com/certificate](http://www.aje.com/certificate). This document certifies that the manuscript listed above was edited for proper English language, grammar, punctuation, spelling, and overall style by one or more of the highly qualified native English speaking editors at American Journal Experts. Neither the research content nor the authors' intentions were altered in any way during the editing process. Documents receiving this certification should be English-ready for publication; however, the author has the ability to accept or reject our suggestions and changes. To verify the final AJE edited version, please visit our verification page. If you have any questions or concerns about this edited document, please contact American Journal Experts at [support@aje.com](mailto:support@aje.com).

American Journal Experts provides a range of editing, translation and manuscript services for researchers and publishers around the world. Our top-quality PhD editors are all native English speakers from America's top universities. Our editors come from nearly every research field and possess the highest qualifications to edit research manuscripts written by non-native English speakers. For more information about our company, services and partner discounts, please visit [www.aje.com](http://www.aje.com).

163 网易免费邮 [davenc@163.com \(102\)](mailto:davenc@163.com) | 手机版 | 升级VIP | 升级服务 | 设置 | 帮助 | 退出

搜索邮件

首页 通讯录 应用中心 收件箱 网易智造 网易严选 一起拼 您的订单

收信 写信

收件箱

- 红旗邮件
- 待办邮件
- 智能标签
- 星标联系人邮件
- ★ [zmky@zju.edu](mailto:zmky@zju.edu)
- ★ 陈韵
- ★ 朱婉波
- ★ 吴小朋
- ★ 蒋佳安
- 草稿箱 (25)
- 已发送
- 订阅邮件 (48)
- > 其他4个文件夹
- > 邮件标签
- > 邮箱中心
- 文件中心
- 收藏夹

Dear Chao Ni,

Thank you again for giving us the opportunity to address your concerns, and we hope that your re-edited manuscript meets your expectations. Your file is now ready to be downloaded from your account, and the date of your editing certificate has been updated.

Please reply to this email if you have any other questions or concerns. We wish you the best of luck with the publication of your manuscript and hope to have the opportunity to work with you again in the future.

Kind regards,

Customer Retention Team  
American Journal Experts  
[www.aje.com](http://www.aje.com)

Order ID: 1M49CKJ7

Files:

- 1M49CKJ7\_manuscript\_revised\_edit\_final\_SH.doc

【早春新品】Ralph Lauren制造高直筒，柔软亲肤男式活力运动裤仅¥189，马上购>>

网易严选
